# Supplementary material
Source: PubMed Central journal article supplement (PMC3056449)

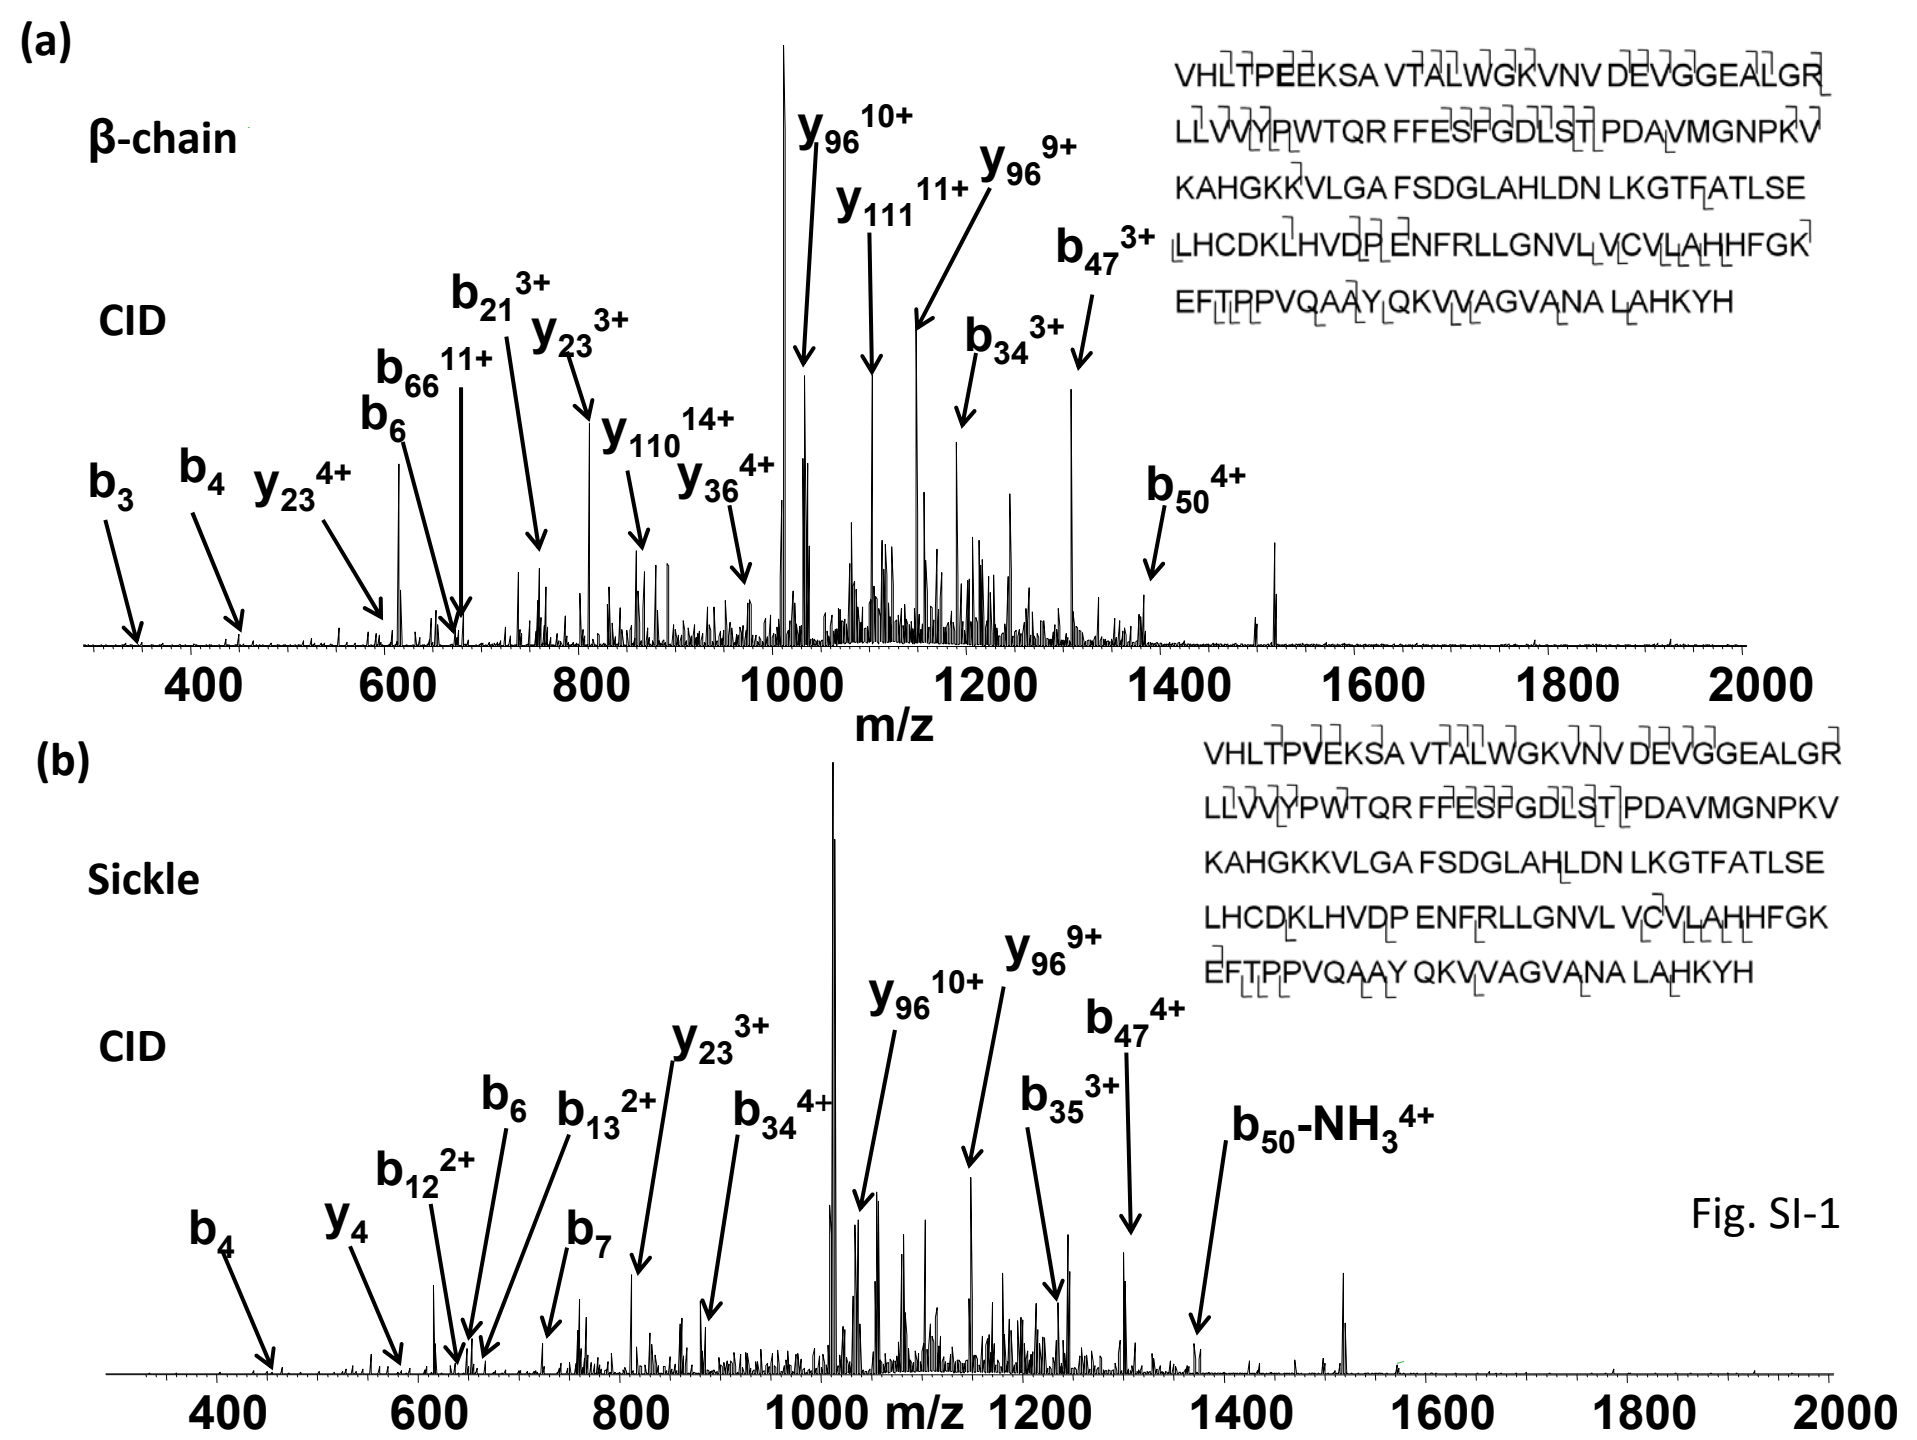

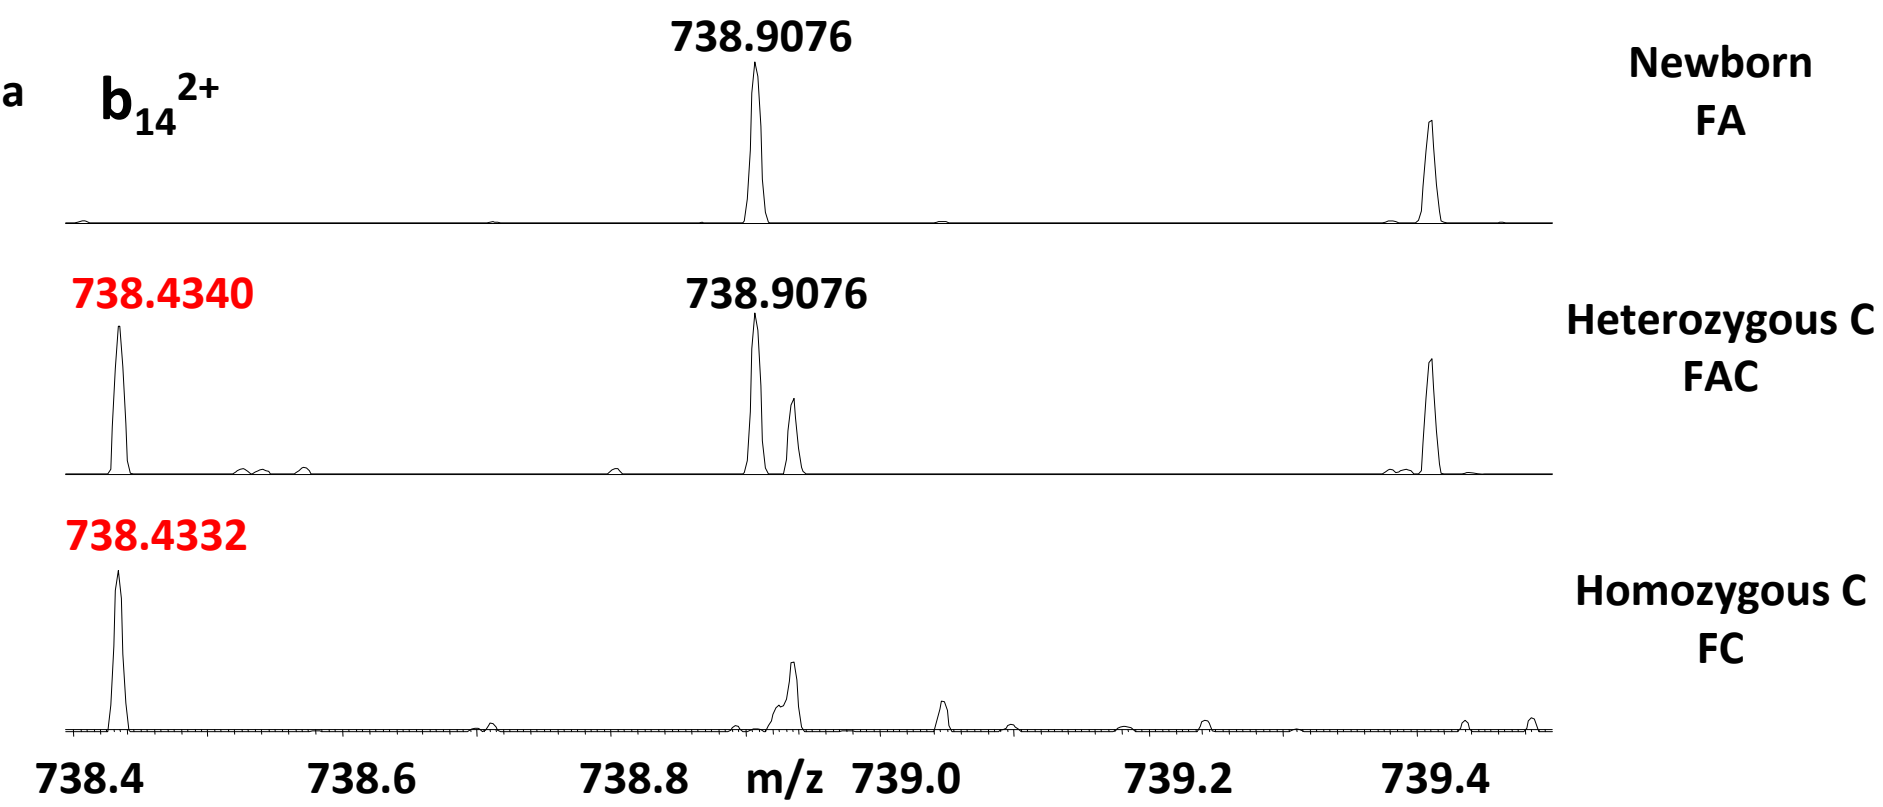

FIG S-2a

b

$b_{47}^{4+}$

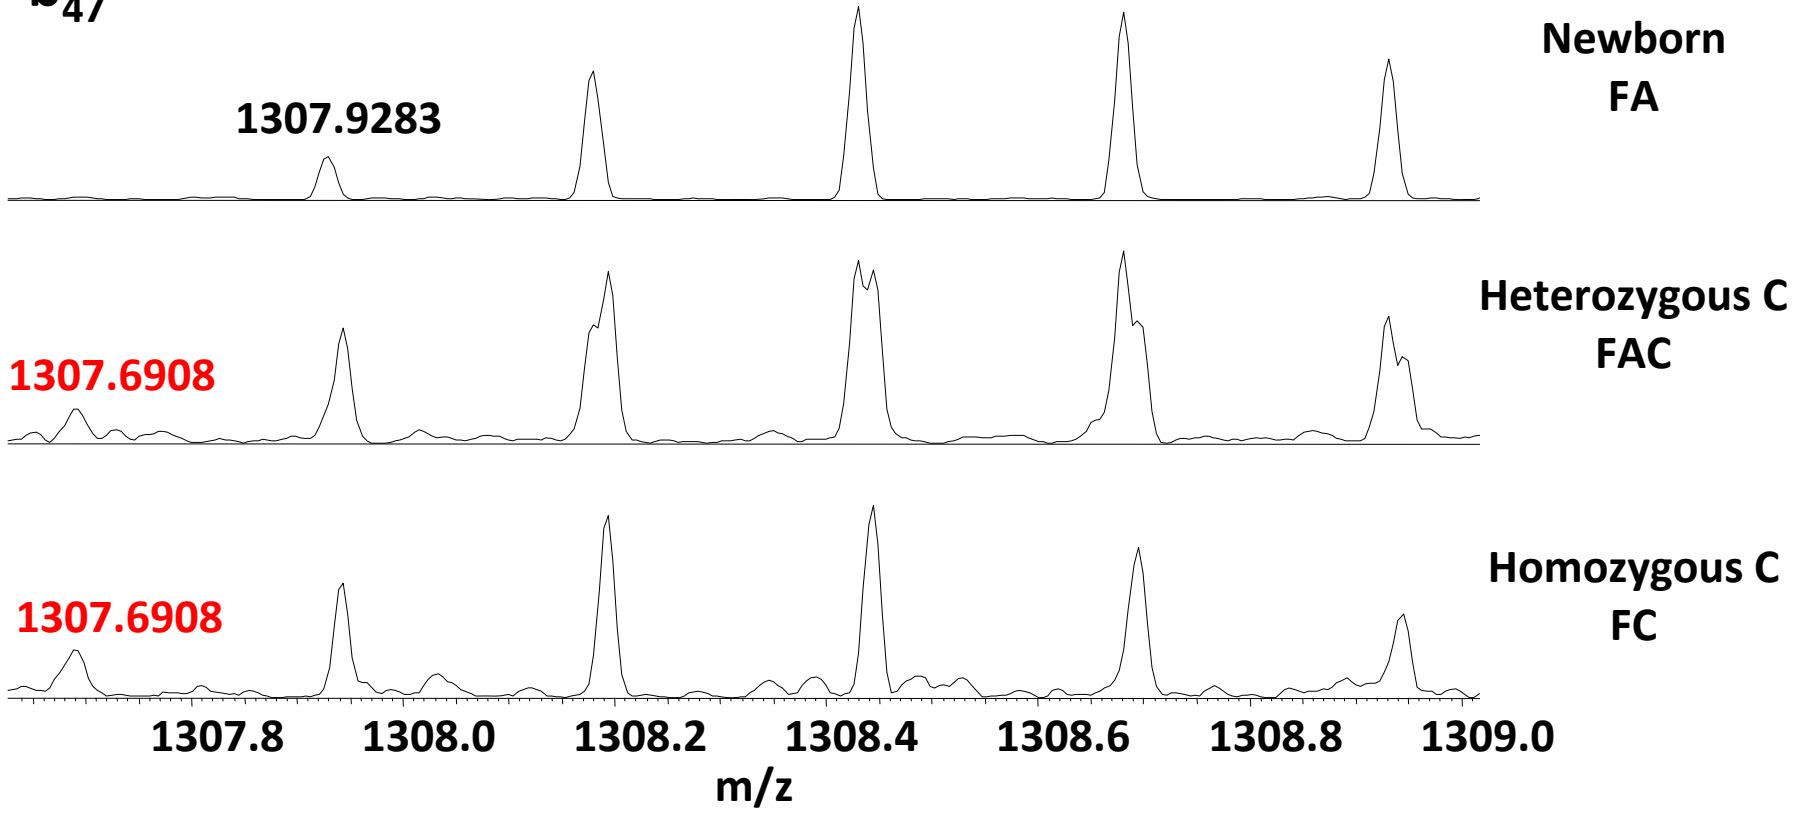

Fig S-2b

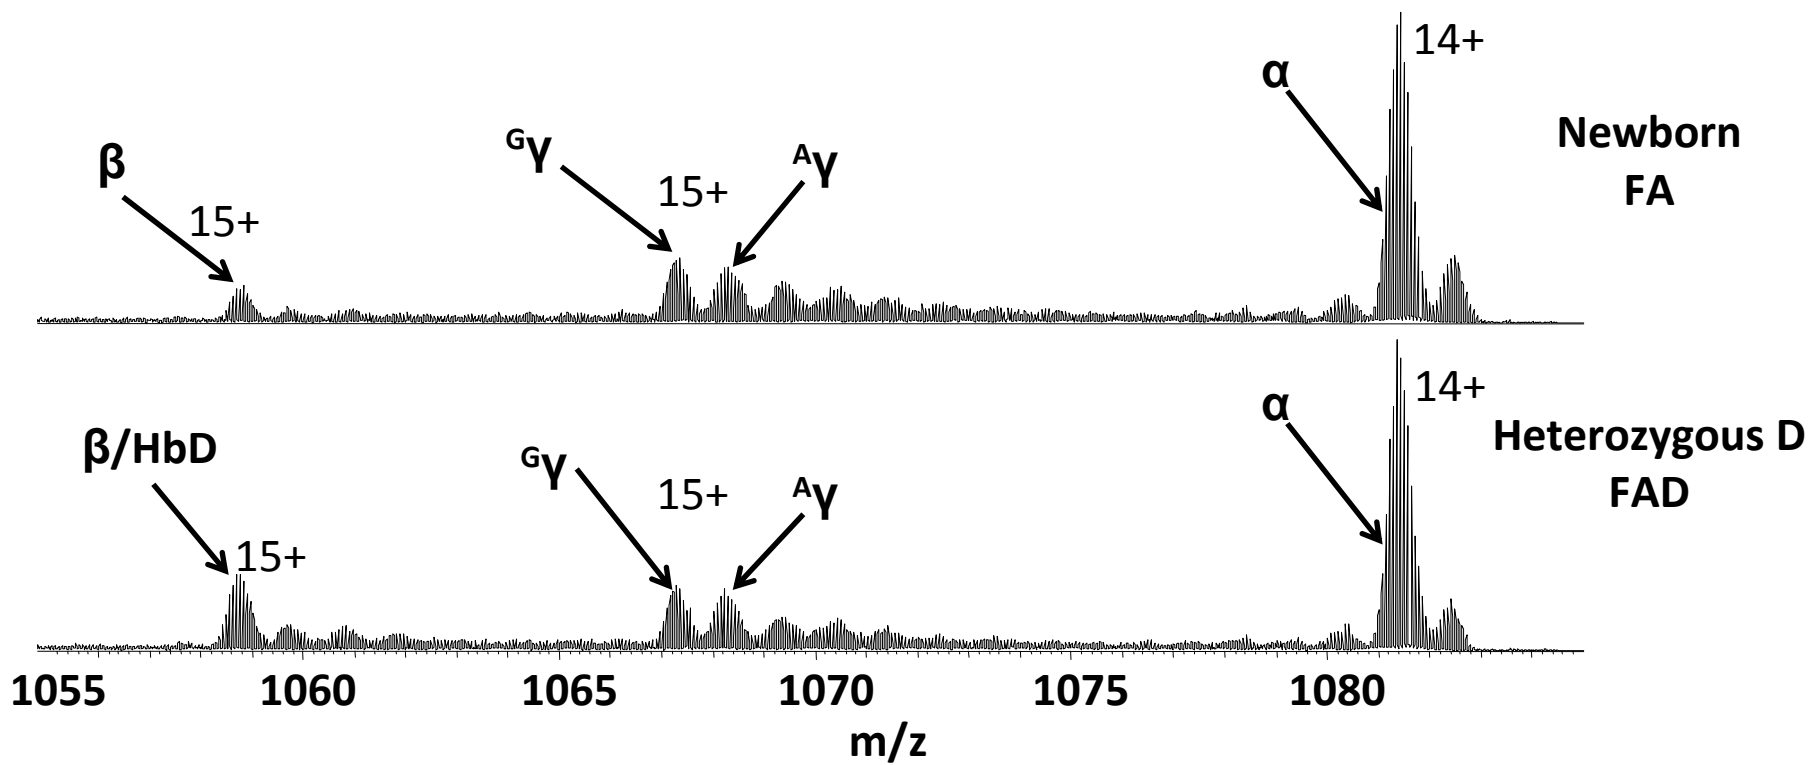

Fig S-3

a

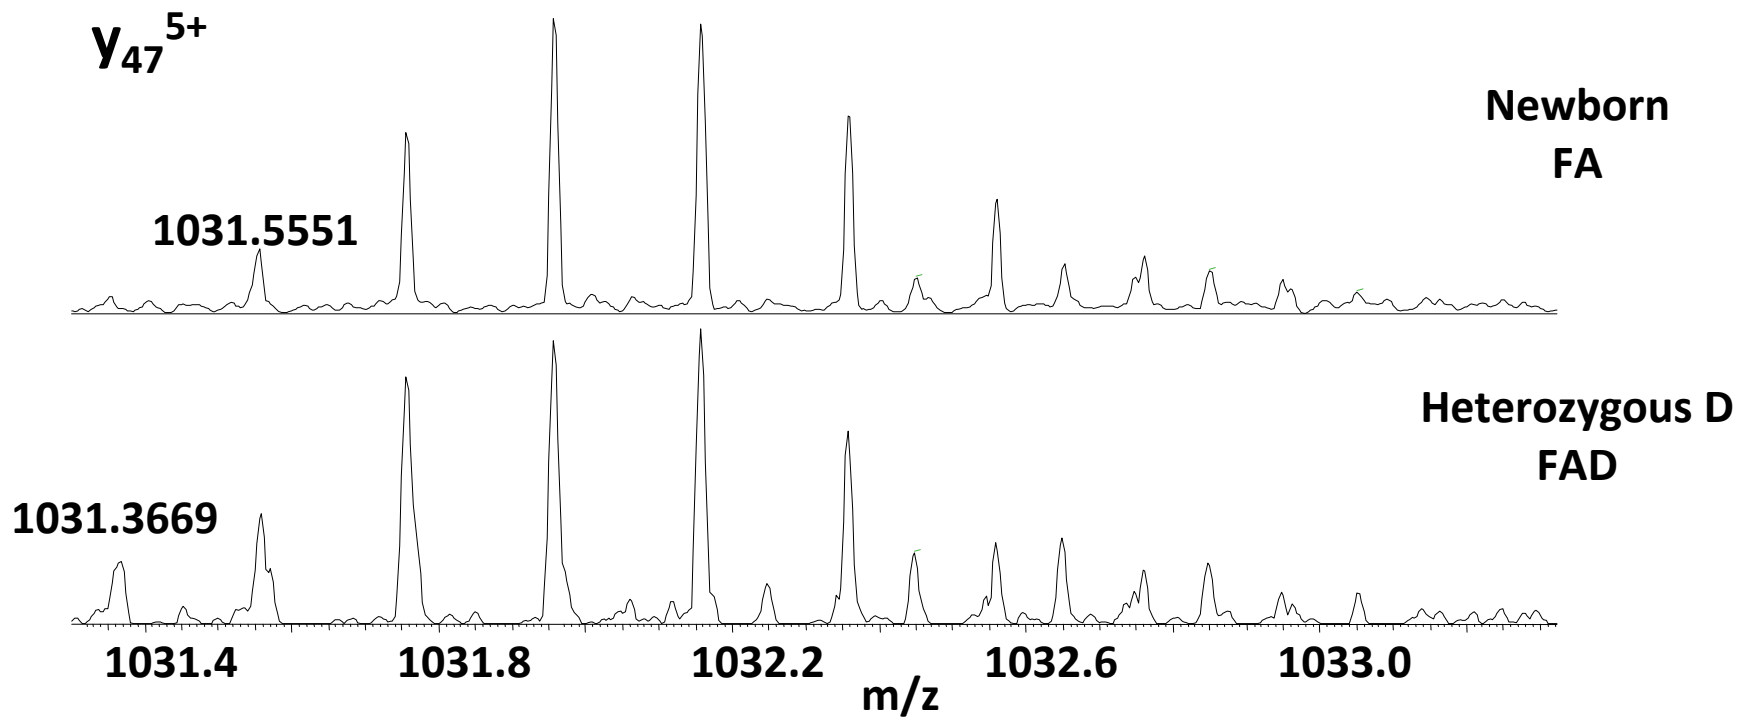

Fig S-4a

b

$Y_{36}^{4+}$

976.0195

Newborn  
FA

975.7714

Heterozygous D  
FAD

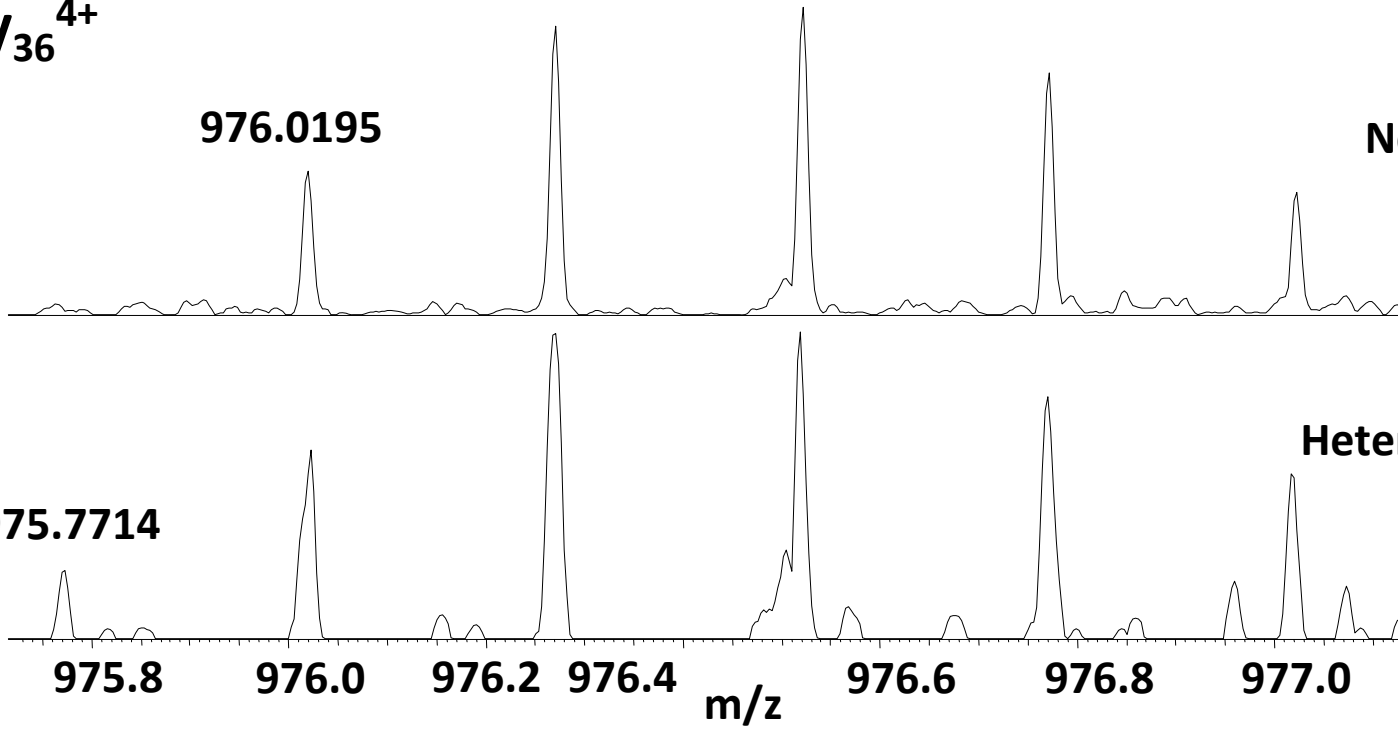

Fig S-4b

Supplement: ac1030804_si_001.pdf [file ac1030804_si_001.pdf]
